# Supplementary material for: Lifestyle and in vitro fertilization: what do patients believe?
Source: PubMed Central journal article supplement (PMC5424337; doi:10.1186/s40738-016-0026-5), 2016-10-12
Supplement: 40738_2016_26_MOESM1_ESM.pdf [file 40738_2016_26_MOESM1_ESM.pdf]

# Lifestyle Factors and In Vitro Fertilization

## 1. Welcome and consent

You have been invited to participate in a research study called "Lifestyle Factors and the Success of In Vitro Fertilization (IVF)," led by Drs. Brooke Rossi and Stacey Missmer.

The purpose of this study is to find out which lifestyle factors or activities you think will affect the success of IVF treatment. Knowing these factors will help physicians and scientists to focus our efforts to better inform all patients about which factors are beneficial and which are not.

About 150 people will participate.

It will take about 10 minutes to complete the survey.

Your answers will be anonymous; we will not link your name or any other information about you to your answers. Also, we will not be able to trace your answers back to your computer.

Taking part is voluntary and you may stop at any time. If you decide not to participate, it won't affect your medical care you receive at Partners now or in the future, or any benefits they receive now or have a right to receive.

If you have any questions about this project, you can contact Dr. Brooke Rossi at 617-732-4841 or Dr. Stacey Missmer at 617-525-2747.

If you'd like to speak to someone not involved in this research about your rights as a research subject, or any concerns or complaints you may have about the research, contact the Partners Human Research Committee at 617-424-4100.

### 1. Please indicate the following:

I AGREE TO PARTICIPATE IN THIS RESEARCH

I DO NOT WANT TO TAKE PART IN THIS RESEARCH

## 2. Declined Survey- Reasons

### 1. Please describe your reason for not taking part in the study.

Not interested in research

Survey is too long

Not interested in this topic

Adds stress

## 3. Declined Survey- Age and gender

# Lifestyle Factors and In Vitro Fertilization

## 1. What is your age (in years)?

34 or younger

35-37

38-40

41-42

43 or older

## 2. Please indicate gender:

Woman

Man

## 4. Declined Survey- Demographics

### 1. Which best describes your ethnic background?

African American

American Indian/ Native Alaskan

Asian

Caucasian

Hispanic

Latino

Hispanic/ Latino

Other Asian American/ Pacific Islander

Other

# Lifestyle Factors and In Vitro Fertilization

## 2. What is your religious preference?

- Catholic
- Protestant
- Islam
- Judaism
- Secular/Agnosticism/Non-religious
- Buddhism
- Hinduism
- Chinese traditional
- Other

## 3. What is the highest education level you have completed?

- Less than high school
- High school
- 2-year college
- 4-year college
- Master's degree
- Medical degree/ Ph.D./ Law degree

## 4. What is your yearly household income (before taxes)?

- Less than \$50,000
- \$50,001 - \$100,000
- \$100,001 - \$150,000
- \$150,001 - \$200,000
- \$200,001 - \$250,000
- More than \$250,000

## 5. Men- Prior pregnancies

# Lifestyle Factors and In Vitro Fertilization

## 1. How long has it been since you got your current partner pregnant?

Less than 1 year

1-2 years

3-4 years

5 or more years

## 6. Age and gender

### 1. What is your age (in years)?

34 or younger

35-37

38-40

41-42

43 or older

### 2. Please indicate gender:

Woman

Man

## 7. Men's history

### 1. How many times have you gotten someone pregnant in the past (including through intercourse and/or infertility treatments)?

0

1

2

3

4

5 or more

## 8. Women's history

# Lifestyle Factors and In Vitro Fertilization

## 1. How many times have you been pregnant?

- 0
- 1
- 2
- 3
- 4
- 5 or more times

## 2. How many live births have you had?

- 0
- 1
- 2
- 3
- 4 or more

## 3. How long has it been since your last pregnancy?

- I have never been pregnant
- Less than 1 year
- 1-2 years
- 3-4 years
- 5 or more years

## 9. Infertility history

### 1. How many months have you been trying to get pregnant?

- Less than 6 months
- 6-12
- 13-24
- More than 24 months

## Lifestyle Factors and In Vitro Fertilization

### 2. What has your doctor think is the primary cause of your difficulty getting pregnant?

- Ovulation problem
- Blocked tubes
- Uterine factor
- Endometriosis
- Male factor
- Decreased ovarian function
- Unexplained
- Cannot remember or do not know the cause
- Other

### 3. How many IVF cycles have you done in the past (1 cycle= egg retrieval and embryo transfer)?

- 0
- 1
- 2
- 3
- 4 or more

## 10. IVF History

### 1. How many IVF cycles have you done that have resulted in the delivery of a live baby?

- 0
- 1
- 2
- 3
- 4 or more

## 11. Demographics

# Lifestyle Factors and In Vitro Fertilization

## 1. Which best describes your ethnic background?

- African American
- American Indian/ Native Alaskan
- Asian
- Caucasian
- Hispanic
- Latino
- Other Asian American/ Pacific Islander
- Other

## 2. What is your religious preference?

- Catholic
- Protestant
- Islam
- Judaism
- Secular/Agnosticism/Non-religious
- Buddhism
- Hinduism
- Chinese traditional
- Other

## 3. What is the highest education level you have completed?

- Less than high school
- High school
- 2-year college
- 4-year college
- Master's degree
- Medical degree/ Ph.D./ Law degree

# Lifestyle Factors and In Vitro Fertilization

## 4. What is your yearly household income (before taxes)?

- Less than \$50,000
- \$50,001 - \$100,000
- \$100,001 - \$150,000
- \$150,001 - \$200,000
- \$200,001 - \$250,000
- More than \$250,000

## 12.

The next set of questions will ask you how important you believe different lifestyle factors are to the success of your IVF cycle.

For each question that follows, please consider how important you think the use of the item or activity is to the success (getting pregnant and having a baby) of your IVF cycle.

If you do not use an item or do an activity, base your answer on how you think the item or activity might affect the IVF cycle of someone who does.

## 13. Caffeine

### 1. How do you think your use of caffeinated drinks is to the success (getting pregnant and having a baby) of your IVF cycle?

|                             | Very harmful          | Harmful               | No effect             | Helpful               | Very helpful          | I don't know/ No opinion |
|-----------------------------|-----------------------|-----------------------|-----------------------|-----------------------|-----------------------|--------------------------|
| No drinks per week          | <input type="radio"/> | <input type="radio"/> | <input type="radio"/> | <input type="radio"/> | <input type="radio"/> | <input type="radio"/>    |
| 1-7 drinks per week         | <input type="radio"/> | <input type="radio"/> | <input type="radio"/> | <input type="radio"/> | <input type="radio"/> | <input type="radio"/>    |
| More than 7 drinks per week | <input type="radio"/> | <input type="radio"/> | <input type="radio"/> | <input type="radio"/> | <input type="radio"/> | <input type="radio"/>    |

## 14. Artificial sweeteners

### 1. How do you think your use artificial sweeteners affect the success (getting pregnant and having a baby) of your IVF cycle?

|                        | Very harmful          | Harmful               | No effect             | Helpful               | Very helpful          | I don't know/ No opinion |
|------------------------|-----------------------|-----------------------|-----------------------|-----------------------|-----------------------|--------------------------|
| No use                 | <input type="radio"/> | <input type="radio"/> | <input type="radio"/> | <input type="radio"/> | <input type="radio"/> | <input type="radio"/>    |
| Less than daily use    | <input type="radio"/> | <input type="radio"/> | <input type="radio"/> | <input type="radio"/> | <input type="radio"/> | <input type="radio"/>    |
| At least once per day  | <input type="radio"/> | <input type="radio"/> | <input type="radio"/> | <input type="radio"/> | <input type="radio"/> | <input type="radio"/>    |
| More than once per day | <input type="radio"/> | <input type="radio"/> | <input type="radio"/> | <input type="radio"/> | <input type="radio"/> | <input type="radio"/>    |

## 15. Smoking



# Lifestyle Factors and In Vitro Fertilization

**1. How do you think smoking the following number cigarettes affect the success (getting pregnant and having a baby) of your IVF cycle?**

|                                 | Very harmful | Harmful | No effect | Helpful | Very helpful | I don't know/ No opinion |
|---------------------------------|--------------|---------|-----------|---------|--------------|--------------------------|
| No use                          | jn           | jn      | jn        | jn      | jn           | jn                       |
| Daily second-hand smoke         | jn           | jn      | jn        | jn      | jn           | jn                       |
| Less than 5 cigarettes per day  | jn           | jn      | jn        | jn      | jn           | jn                       |
| 5-10 cigarettes per day         | jn           | jn      | jn        | jn      | jn           | jn                       |
| 11-20 cigarettes per day        | jn           | jn      | jn        | jn      | jn           | jn                       |
| More than 20 cigarettes per day | jn           | jn      | jn        | jn      | jn           | jn                       |

## 16. Alcohol

**1. How do you think the following types and amount of alcohol affects the success (getting pregnant and having a baby) of your IVF cycle?**

|                                           | Very harmful | Harmful | No effect | Helpful | Very helpful | I don't know/ No opinion |
|-------------------------------------------|--------------|---------|-----------|---------|--------------|--------------------------|
| No alcohol                                | jn           | jn      | jn        | jn      | jn           | jn                       |
| 1-4 drinks of beer per week               | jn           | jn      | jn        | jn      | jn           | jn                       |
| More than 4 drinks of beer per week       | jn           | jn      | jn        | jn      | jn           | jn                       |
| 1-4 drinks of white wine per week         | jn           | jn      | jn        | jn      | jn           | jn                       |
| More than 4 drinks of white wine per week | jn           | jn      | jn        | jn      | jn           | jn                       |
| 1-4 drinks of red wine per week           | jn           | jn      | jn        | jn      | jn           | jn                       |
| More than 4 drinks of red wine per week   | jn           | jn      | jn        | jn      | jn           | jn                       |
| 1-4 drinks of liquor per week             | jn           | jn      | jn        | jn      | jn           | jn                       |
| More than 4 drinks of liquor per week     | jn           | jn      | jn        | jn      | jn           | jn                       |

## 17. Foods

## Lifestyle Factors and In Vitro Fertilization

### 1. How do you think the following types of food affect the success (getting pregnant and having a baby) of your IVF cycle?

|                                  | Very harmful | Harmful | No effect | Helpful | Very helpful | I don't know/ No opinion |
|----------------------------------|--------------|---------|-----------|---------|--------------|--------------------------|
| No specific (regular) diet       | jn           | jn      | jn        | jn      | jn           | jn                       |
| Low fat diet                     | jn           | jn      | jn        | jn      | jn           | jn                       |
| Low carbohydrate diet            | jn           | jn      | jn        | jn      | jn           | jn                       |
| Vegetarian diet                  | jn           | jn      | jn        | jn      | jn           | jn                       |
| Organic food                     | jn           | jn      | jn        | jn      | jn           | jn                       |
| Increase in fruit and vegetables | jn           | jn      | jn        | jn      | jn           | jn                       |
| High protein diet                | jn           | jn      | jn        | jn      | jn           | jn                       |
| Full-fat milk or dairy products  | jn           | jn      | jn        | jn      | jn           | jn                       |

## 18. Vitamins and herbal medicine

### 1. How do you think that taking the following vitamins or herbs affect the success (getting pregnant and having a baby) of your IVF cycle?

|                               | Very harmful | Harmful | No effect | Helpful | Very helpful | I don't know/ No opinion |
|-------------------------------|--------------|---------|-----------|---------|--------------|--------------------------|
| No vitamins or herbs          | jn           | jn      | jn        | jn      | jn           | jn                       |
| Prenatal vitamin              | jn           | jn      | jn        | jn      | jn           | jn                       |
| Multivitamin                  | jn           | jn      | jn        | jn      | jn           | jn                       |
| Zinc                          | jn           | jn      | jn        | jn      | jn           | jn                       |
| Dehydroepiandrosterone (DHEA) | jn           | jn      | jn        | jn      | jn           | jn                       |
| Vitamin B6                    | jn           | jn      | jn        | jn      | jn           | jn                       |
| Vitamin C                     | jn           | jn      | jn        | jn      | jn           | jn                       |
| Vitamin D                     | jn           | jn      | jn        | jn      | jn           | jn                       |
| Vitamin E                     | jn           | jn      | jn        | jn      | jn           | jn                       |
| Chinese herbal medicine       | jn           | jn      | jn        | jn      | jn           | jn                       |

## 19. Over the counter medications

## Lifestyle Factors and In Vitro Fertilization

1. How do you think that taking the following over the counter medications affect the success (getting pregnant and having a baby) of your IVF cycle?

|                                 | Very harmful | Harmful | No effect | Helpful | Very helpful | I don't know/ No opinion |
|---------------------------------|--------------|---------|-----------|---------|--------------|--------------------------|
| No over the counter medications | jn           | jn      | jn        | jn      | jn           | jn                       |
| Baby aspirin                    | jn           | jn      | jn        | jn      | jn           | jn                       |
| Ibuprofen                       | jn           | jn      | jn        | jn      | jn           | jn                       |
| Tylenol                         | jn           | jn      | jn        | jn      | jn           | jn                       |
| Cold/allergy medication         | jn           | jn      | jn        | jn      | jn           | jn                       |

## 20. Stress

1. How do you think that stress affects the success (getting pregnant and having a baby) of your IVF cycle?

|           | Very harmful | Harmful | No effect | Helpful | Very helpful | I don't know/ No opinion |
|-----------|--------------|---------|-----------|---------|--------------|--------------------------|
| No stress | jn           | jn      | jn        | jn      | jn           | jn                       |
| Stress    | jn           | jn      | jn        | jn      | jn           | jn                       |

## 21. Attitude

1. How do you think that your attitude affects the success (getting pregnant and having a baby) of your IVF cycle?

|                                        | Very harmful | Harmful | No effect | Helpful | Very helpful | I don't know/ No opinion |
|----------------------------------------|--------------|---------|-----------|---------|--------------|--------------------------|
| Neither positive nor negative attitude | jn           | jn      | jn        | jn      | jn           | jn                       |
| Positive attitude                      | jn           | jn      | jn        | jn      | jn           | jn                       |
| Negative attitude                      | jn           | jn      | jn        | jn      | jn           | jn                       |

## 22. Body weight

1. How do you think the following different body weights affect the success (getting pregnant and having a baby) of an IVF cycle?

|               | Very harmful | Harmful | No effect | Helpful | Very helpful | I don't know/ No opinion |
|---------------|--------------|---------|-----------|---------|--------------|--------------------------|
| Underweight   | jn           | jn      | jn        | jn      | jn           | jn                       |
| Normal weight | jn           | jn      | jn        | jn      | jn           | jn                       |
| Overweight    | jn           | jn      | jn        | jn      | jn           | jn                       |
| Obese         | jn           | jn      | jn        | jn      | jn           | jn                       |

## 23. Yoga

## Lifestyle Factors and In Vitro Fertilization

**1. How do you think different amounts of yoga affects the success (getting pregnant and having a baby) of your IVF cycle?**

|                             | Very harmful | Harmful | No effect | Helpful | Very helpful | I don't know/ No opinion |
|-----------------------------|--------------|---------|-----------|---------|--------------|--------------------------|
| No yoga                     | jn           | jn      | jn        | jn      | jn           | jn                       |
| Once per week               | jn           | jn      | jn        | jn      | jn           | jn                       |
| 2-6 sessions per week       | jn           | jn      | jn        | jn      | jn           | jn                       |
| 7 or more sessions per week | jn           | jn      | jn        | jn      | jn           | jn                       |

### 24. Accupuncture

**1. How do you think accupuncture around the time of embryo transfer affects the success (getting pregnant and having a baby) of your IVF cycle?**

|                 | Very harmful | Harmful | No effect | Helpful | Very helpful | I don't know/ No opinion |
|-----------------|--------------|---------|-----------|---------|--------------|--------------------------|
| No accupuncture | jn           | jn      | jn        | jn      | jn           | jn                       |
| Accupuncture    | jn           | jn      | jn        | jn      | jn           | jn                       |

### 25. Exercise

**1. How do you think exercise affects the success (getting pregnant and having a baby) of your IVF cycle?**

|                           | Very harmful | Harmful | No effect | Helpful | Very helpful | I don't know/ No opinion |
|---------------------------|--------------|---------|-----------|---------|--------------|--------------------------|
| No exercise               | jn           | jn      | jn        | jn      | jn           | jn                       |
| Less than 1 hour per week | jn           | jn      | jn        | jn      | jn           | jn                       |
| 1-3 hours per week        | jn           | jn      | jn        | jn      | jn           | jn                       |
| 4 or more hours per week  | jn           | jn      | jn        | jn      | jn           | jn                       |

### 26. Rest

**1. How do you think that resting (avoiding exercise or strenuous activity) the week after the embryo transfer affects the success (getting pregnant and having a baby) of your IVF cycle?**

|                                             | Very harmful | Harmful | No effect | Helpful | Very helpful | I don't know/ No opinion |
|---------------------------------------------|--------------|---------|-----------|---------|--------------|--------------------------|
| Normal activities/ no rest                  | jn           | jn      | jn        | jn      | jn           | jn                       |
| Limits on strenuous activities and exercise | jn           | jn      | jn        | jn      | jn           | jn                       |
| Bed rest                                    | jn           | jn      | jn        | jn      | jn           | jn                       |

### 27. Prayer

## Lifestyle Factors and In Vitro Fertilization

**1. How do you think praying for the success of your IVF cycle affects the success (getting pregnant and having a baby) of your IVF cycle?**

|           | Very harmful | Harmful | No effect | Helpful | Very helpful | I don't know/ No opinion |
|-----------|--------------|---------|-----------|---------|--------------|--------------------------|
| No prayer | jn           | jn      | jn        | jn      | jn           | jn                       |
| Prayer    | jn           | jn      | jn        | jn      | jn           | jn                       |

### 28. Cell phones

**1. How do you think that typical cell phone usage affects the success (getting pregnant and having a baby) of your IVF cycle?**

|                           | Very harmful | Harmful | No effect | Helpful | Very helpful | I don't know/ No opinion |
|---------------------------|--------------|---------|-----------|---------|--------------|--------------------------|
| Limiting cell phone usage | jn           | jn      | jn        | jn      | jn           | jn                       |
| Typical cell phone usage  | jn           | jn      | jn        | jn      | jn           | jn                       |

### 29. Environment/ plastics

**1. How do you think typical exposure to plastics (water bottles, food containers) affects the success of your IVF cycle (getting pregnant and having a baby) of your IVF cycle?**

|                               | Very harmful | Harmful | No effect | Helpful | Very helpful | I don't know/ No opinion |
|-------------------------------|--------------|---------|-----------|---------|--------------|--------------------------|
| Limiting exposure to plastics | jn           | jn      | jn        | jn      | jn           | jn                       |
| Typical exposure to plastics  | jn           | jn      | jn        | jn      | jn           | jn                       |

### 30. Other factors

**1. If there any other lifestyle factors (items or activities) that you think affect the success of your IVF cycle that have not been mentioned in this survey, please write them here.**

### 31. Partner lifestyle factors

The next set of questions will ask you how important you believe YOUR PARTNER'S USE of different lifestyle factors are to the success of your IVF cycle.

For each question that follows, please consider how important you think YOUR PARTNER'S use of the item or activity is to the success (getting pregnant and having a baby) of your IVF cycle.

If YOUR PARTNER does not use an item, base your answer on how you think the item might affect the IVF cycle of someone who does.

# Lifestyle Factors and In Vitro Fertilization

## 32. Caffeine- Partner use

1. How do you think your partner's use of caffeinated drinks is to the success (getting pregnant and having a baby) of your IVF cycle?

|                             | Very harmful | Harmful | No effect | Helpful | Very helpful | I don't know/ No opinion |
|-----------------------------|--------------|---------|-----------|---------|--------------|--------------------------|
| No drinks per week          | jn           | jn      | jn        | jn      | jn           | jn                       |
| 1-7 drinks per week         | jn           | jn      | jn        | jn      | jn           | jn                       |
| More than 7 drinks per week | jn           | jn      | jn        | jn      | jn           | jn                       |

## 33. Artificial sweeteners- Partner use

1. How do you think your partner's use artificial sweeteners affect the success (getting pregnant and having a baby) of your IVF cycle?

|                        | Very harmful | Harmful | No effect | Helpful | Very helpful | I don't know/ No opinion |
|------------------------|--------------|---------|-----------|---------|--------------|--------------------------|
| No use                 | jn           | jn      | jn        | jn      | jn           | jn                       |
| Less than daily use    | jn           | jn      | jn        | jn      | jn           | jn                       |
| At least once per day  | jn           | jn      | jn        | jn      | jn           | jn                       |
| More than once per day | jn           | jn      | jn        | jn      | jn           | jn                       |

## 34. Smoking- Partner use

1. How do you think your partner's smoking the following number cigarettes affect the success (getting pregnant and having a baby) of your IVF cycle?

|                                 | Very harmful | Harmful | No effect | Helpful | Very helpful | I don't know/ No opinion |
|---------------------------------|--------------|---------|-----------|---------|--------------|--------------------------|
| No use                          | jn           | jn      | jn        | jn      | jn           | jn                       |
| Daily second-hand smoke         | jn           | jn      | jn        | jn      | jn           | jn                       |
| Less than 5 cigarettes per day  | jn           | jn      | jn        | jn      | jn           | jn                       |
| 5-10 cigarettes per day         | jn           | jn      | jn        | jn      | jn           | jn                       |
| 11-20 cigarettes per day        | jn           | jn      | jn        | jn      | jn           | jn                       |
| More than 20 cigarettes per day | jn           | jn      | jn        | jn      | jn           | jn                       |

## 35. Alcohol- Partner use

## Lifestyle Factors and In Vitro Fertilization

**1. How do you think your partner drinking the following types and amount of alcohol affects the success (getting pregnant and having a baby) of your IVF cycle?**

|                                           | Very harmful | Harmful | No effect | Helpful | Very helpful | I don't know/ No opinion |
|-------------------------------------------|--------------|---------|-----------|---------|--------------|--------------------------|
| No alcohol                                | jn           | jn      | jn        | jn      | jn           | jn                       |
| 1-4 drinks of beer per week               | jn           | jn      | jn        | jn      | jn           | jn                       |
| More than 4 drinks of beer per week       | jn           | jn      | jn        | jn      | jn           | jn                       |
| 1-4 drinks of white wine per week         | jn           | jn      | jn        | jn      | jn           | jn                       |
| More than 4 drinks of white wine per week | jn           | jn      | jn        | jn      | jn           | jn                       |
| 1-4 drinks of red wine per week           | jn           | jn      | jn        | jn      | jn           | jn                       |
| More than 4 drinks of red wine per week   | jn           | jn      | jn        | jn      | jn           | jn                       |
| 1-4 drinks of liquor per week             | jn           | jn      | jn        | jn      | jn           | jn                       |
| More than 4 drinks of liquor per week     | jn           | jn      | jn        | jn      | jn           | jn                       |

## 36. Foods- Partner use

**1. How do you think your partner eating the following types of food affects the success (getting pregnant and having a baby) of your IVF cycle?**

|                                  | Very harmful | Harmful | No effect | Helpful | Very helpful | I don't know/ No opinion |
|----------------------------------|--------------|---------|-----------|---------|--------------|--------------------------|
| No specific (regular) diet       | jn           | jn      | jn        | jn      | jn           | jn                       |
| Low fat diet                     | jn           | jn      | jn        | jn      | jn           | jn                       |
| Low carbohydrate diet            | jn           | jn      | jn        | jn      | jn           | jn                       |
| Vegetarian diet                  | jn           | jn      | jn        | jn      | jn           | jn                       |
| Organic food                     | jn           | jn      | jn        | jn      | jn           | jn                       |
| Increase in fruit and vegetables | jn           | jn      | jn        | jn      | jn           | jn                       |
| High protein diet                | jn           | jn      | jn        | jn      | jn           | jn                       |
| Full-fat milk or dairy products  | jn           | jn      | jn        | jn      | jn           | jn                       |

## 37. Vitamins and herbal medicine- Partner use

## Lifestyle Factors and In Vitro Fertilization

1. How do you think that your partner taking the following vitamins affect the success (getting pregnant and having a baby) of your IVF cycle?

|                               | Very harmful | Harmful | No effect | Helpful | Very helpful | I don't know/ No opinion |
|-------------------------------|--------------|---------|-----------|---------|--------------|--------------------------|
| No vitamins or herbs          | ja           | ja      | ja        | ja      | ja           | ja                       |
| Prenatal vitamin              | ja           | ja      | ja        | ja      | ja           | ja                       |
| Multivitamin                  | ja           | ja      | ja        | ja      | ja           | ja                       |
| Zinc                          | ja           | ja      | ja        | ja      | ja           | ja                       |
| Dehydroepiandrosterone (DHEA) | ja           | ja      | ja        | ja      | ja           | ja                       |
| Vitamin B6                    | ja           | ja      | ja        | ja      | ja           | ja                       |
| Vitamin C                     | ja           | ja      | ja        | ja      | ja           | ja                       |
| Vitamin D                     | ja           | ja      | ja        | ja      | ja           | ja                       |
| Vitamin E                     | ja           | ja      | ja        | ja      | ja           | ja                       |
| Chinese herbal medicine       | ja           | ja      | ja        | ja      | ja           | ja                       |

### 38. Over the counter medications- Partner use

1. How do you think your partner's use of the following over the counter medications affect the success (getting pregnant and having a baby) of your IVF cycle?

|                                 | Very harmful | Harmful | No effect | Helpful | Very helpful | I don't know/ No opinion |
|---------------------------------|--------------|---------|-----------|---------|--------------|--------------------------|
| No over the counter medications | ja           | ja      | ja        | ja      | ja           | ja                       |
| Baby aspirin                    | ja           | ja      | ja        | ja      | ja           | ja                       |
| Ibuprofen                       | ja           | ja      | ja        | ja      | ja           | ja                       |
| Tylenol                         | ja           | ja      | ja        | ja      | ja           | ja                       |
| Cold/allergy medication         | ja           | ja      | ja        | ja      | ja           | ja                       |

### 39. Stress- Partner

1. How do you think that your partner's stress affects the success (getting pregnant and having a baby) of your IVF cycle?

|           | Very harmful | Harmful | No effect | Helpful | Very helpful | I don't know/ No opinion |
|-----------|--------------|---------|-----------|---------|--------------|--------------------------|
| No stress | ja           | ja      | ja        | ja      | ja           | ja                       |
| Stress    | ja           | ja      | ja        | ja      | ja           | ja                       |

### 40. Attitude- Partner



# Lifestyle Factors and In Vitro Fertilization

**1. How do you think that your partner's attitude affects the success (getting pregnant and having a baby) of your IVF cycle?**

|                                        | Very harmful | Harmful | No effect | Helpful | Very helpful | I don't know/ No opinion |
|----------------------------------------|--------------|---------|-----------|---------|--------------|--------------------------|
| Neither positive nor negative attitude | jn           | jn      | jn        | jn      | jn           | jn                       |
| Positive attitude                      | jn           | jn      | jn        | jn      | jn           | jn                       |
| Negative attitude                      | jn           | jn      | jn        | jn      | jn           | jn                       |

## 41. Body weight- Partner

**1. How do you think the following partner's body weight affects the success (getting pregnant and having a baby) of an IVF cycle?**

|               | Very harmful | Harmful | No effect | Helpful | Very helpful | I don't know/ No opinion |
|---------------|--------------|---------|-----------|---------|--------------|--------------------------|
| Underweight   | jn           | jn      | jn        | jn      | jn           | jn                       |
| Normal weight | jn           | jn      | jn        | jn      | jn           | jn                       |
| Overweight    | jn           | jn      | jn        | jn      | jn           | jn                       |
| Obese         | jn           | jn      | jn        | jn      | jn           | jn                       |

## 42. Yoga- Partner

**1. How do you think different amounts of your partner doing yoga affects the success (getting pregnant and having a baby) of your IVF cycle?**

|                             | Very harmful | Harmful | No effect | Helpful | Very helpful | I don't know/ No opinion |
|-----------------------------|--------------|---------|-----------|---------|--------------|--------------------------|
| No yoga                     | jn           | jn      | jn        | jn      | jn           | jn                       |
| Once per week               | jn           | jn      | jn        | jn      | jn           | jn                       |
| 2-6 sessions per week       | jn           | jn      | jn        | jn      | jn           | jn                       |
| 7 or more sessions per week | jn           | jn      | jn        | jn      | jn           | jn                       |

## 43. Accupuncture- Partner

**1. How do you think that your partner having accupuncture around the time of embryo transfer affects the success (getting pregnant and having a baby) of your IVF cycle?**

|                 | Very harmful | Harmful | No effect | Helpful | Very helpful | I don't know/ No opinion |
|-----------------|--------------|---------|-----------|---------|--------------|--------------------------|
| No accupuncture | jn           | jn      | jn        | jn      | jn           | jn                       |
| Accupuncture    | jn           | jn      | jn        | jn      | jn           | jn                       |

## 44. Exercise- Partner

## Lifestyle Factors and In Vitro Fertilization

**1. How do you think your partner's exercise affects the success (getting pregnant and having a baby) of your IVF cycle?**

|                           | Very harmful | Harmful | No effect | Helpful | Very helpful | I don't know/ No opinion |
|---------------------------|--------------|---------|-----------|---------|--------------|--------------------------|
| No exercise               | jn           | jn      | jn        | jn      | jn           | jn                       |
| Less than 1 hour per week | jn           | jn      | jn        | jn      | jn           | jn                       |
| 1-3 hours per week        | jn           | jn      | jn        | jn      | jn           | jn                       |
| 4 or more hours per week  | jn           | jn      | jn        | jn      | jn           | jn                       |

### 45. Rest- Partner

**1. How do you think that your partner resting (avoiding exercise or strenuous activity) the week after the embryo transfer affects the success (getting pregnant and having a baby) of your IVF cycle?**

|                                             | Very harmful | Harmful | No effect | Helpful | Very helpful | I don't know/ No opinion |
|---------------------------------------------|--------------|---------|-----------|---------|--------------|--------------------------|
| Normal activities/ no rest                  | jn           | jn      | jn        | jn      | jn           | jn                       |
| Limits on strenuous activities and exercise | jn           | jn      | jn        | jn      | jn           | jn                       |
| Bed rest                                    | jn           | jn      | jn        | jn      | jn           | jn                       |

### 46. Prayer- Partner

**1. How do you think your partner praying for the success of your IVF cycle affects the success (getting pregnant and having a baby) of your IVF cycle?**

|           | Very harmful | Harmful | No effect | Helpful | Very helpful | I don't know/ No opinion |
|-----------|--------------|---------|-----------|---------|--------------|--------------------------|
| No prayer | jn           | jn      | jn        | jn      | jn           | jn                       |
| Prayer    | jn           | jn      | jn        | jn      | jn           | jn                       |

### 47. Cell phones- Partner

**1. How do you think that your partner's typical cell phone usage affects the success (getting pregnant and having a baby) of your IVF cycle?**

|                           | Very harmful | Harmful | No effect | Helpful | Very helpful | I don't know/ No opinion |
|---------------------------|--------------|---------|-----------|---------|--------------|--------------------------|
| Limiting cell phone usage | jn           | jn      | jn        | jn      | jn           | jn                       |
| Typical cell phone usage  | jn           | jn      | jn        | jn      | jn           | jn                       |

### 48. Environment/ plastics- Partner

# Lifestyle Factors and In Vitro Fertilization

**1. How do you think that your partner's typical exposure to plastics (water bottles, food containers) affects the success (getting pregnant and having a baby) of your IVF cycle?**

|                               | Very harmful | Harmful | No effect | Helpful | Very helpful | I don't know/ No opinion |
|-------------------------------|--------------|---------|-----------|---------|--------------|--------------------------|
| Limiting exposure to plastics | jn           | jn      | jn        | jn      | jn           | jn                       |
| Typical exposure to plastics  | jn           | jn      | jn        | jn      | jn           | jn                       |

## 49. Other factors- Partner

**1. If there any other lifestyle factors (items or activities) that you think affect the success of your IVF cycle that have not been mentioned in this survey, please write them here.**

## 50. Sources of information

**1. How influential is each of the following in making your beliefs expressed in this survey?**

|           | No effect | Influential | Very influential |
|-----------|-----------|-------------|------------------|
| Physician | jn        | jn          | jn               |
| Nurse     | jn        | jn          | jn               |
| Friends   | jn        | jn          | jn               |
| Family    | jn        | jn          | jn               |
| Internet  | jn        | jn          | jn               |
| Books     | jn        | jn          | jn               |

Other (please specify)

## 51.

**1. If you have any other comments, please state them here.**

## 52.

Thank you for your time!
